# Supplementary material for: Reduced excitatory neuron activity and interneuron-type-specific deficits in a mouse model of Alzheimer’s disease
Source: PubMed Central journal article supplement (PMC9718858; doi:10.1038/s42003-022-04268-x), 2022-12-02
Supplement: 42003_2022_4268_MOESM3_ESM.pdf [file 42003_2022_4268_MOESM3_ESM.pdf]

## Description of Additional Supplementary Files

**File name:** Supplementary Movie 1

**Description:** Spontaneous activity of jgcamp7s-expressing somatostatin interneurons in an APP/PS1 mouse under 1% isoflurane anesthesia.

**File name:** Supplementary Movie 2

**Description:** Spontaneous activity of jgcamp7s-expressing parvalbumin interneurons in a non-transgenic mouse under 1% isoflurane anesthesia.

**File name:** Supplementary Movie 3

**Description:** Spontaneous activity of gcamp6s-expressing pyramidal neurons in a non-transgenic mouse under 1% isoflurane anesthesia.

**File name:** Supplementary Movie 4

**Description:** Spontaneous activity of gcamp6s-expressing pyramidal neurons in an APP/PS1 mouse under 1% isoflurane anesthesia. Amyloid plaque is shown in magenta.
